# Supplementary material for: Steroid Hormone Secretion Over the Course of the Perimenopause: Findings From the Swiss Perimenopause Study
Source: Frontiers journal article supplement (doi:10.3389/fgwh.2021.774308), 2021-12-14
Supplement: Data_Sheet_1.PDF [file Data_Sheet_1.PDF]

## Supplementary Material

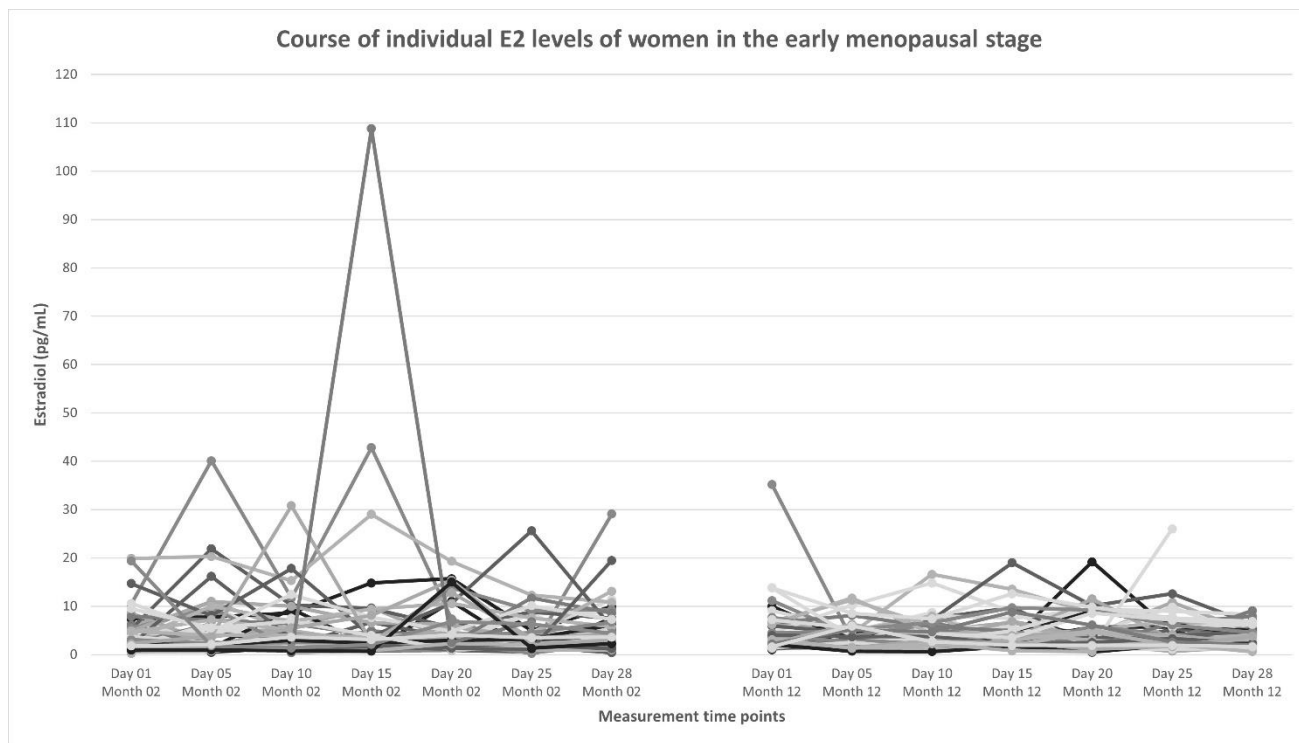

(A)

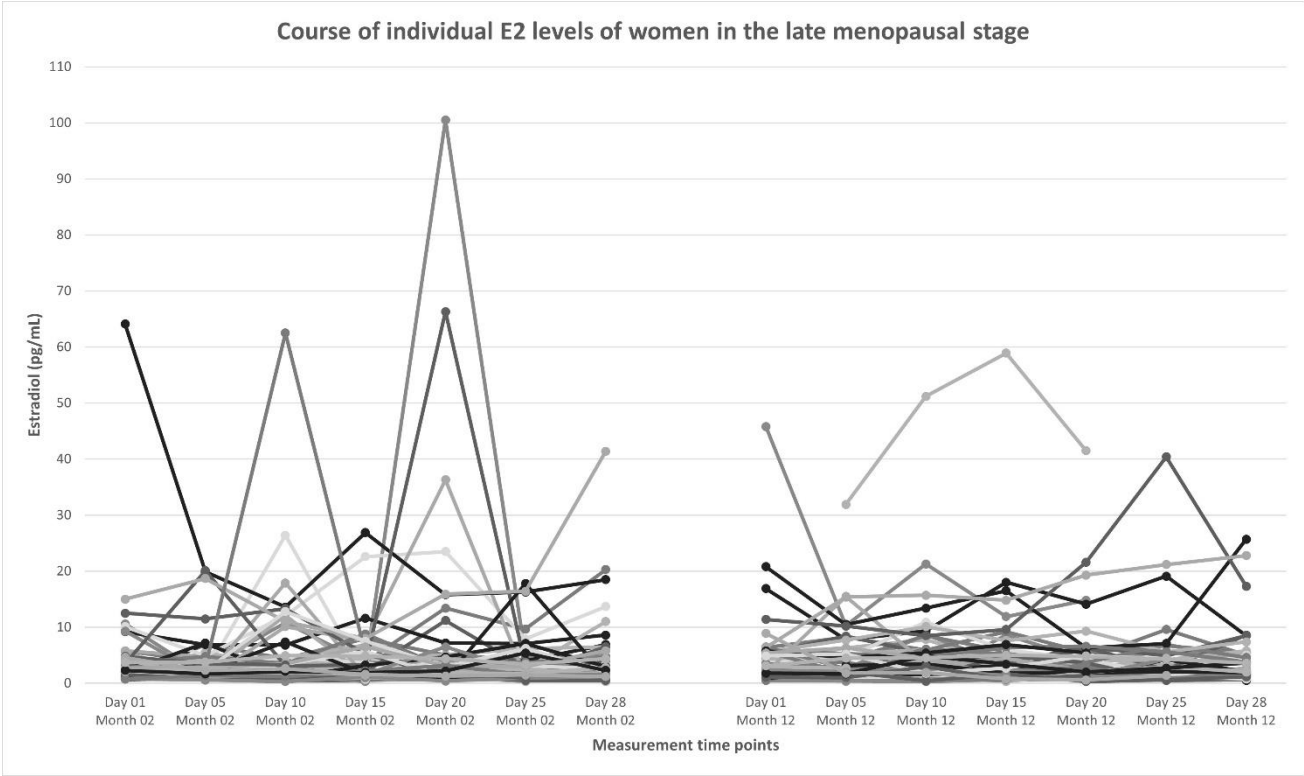

(B)

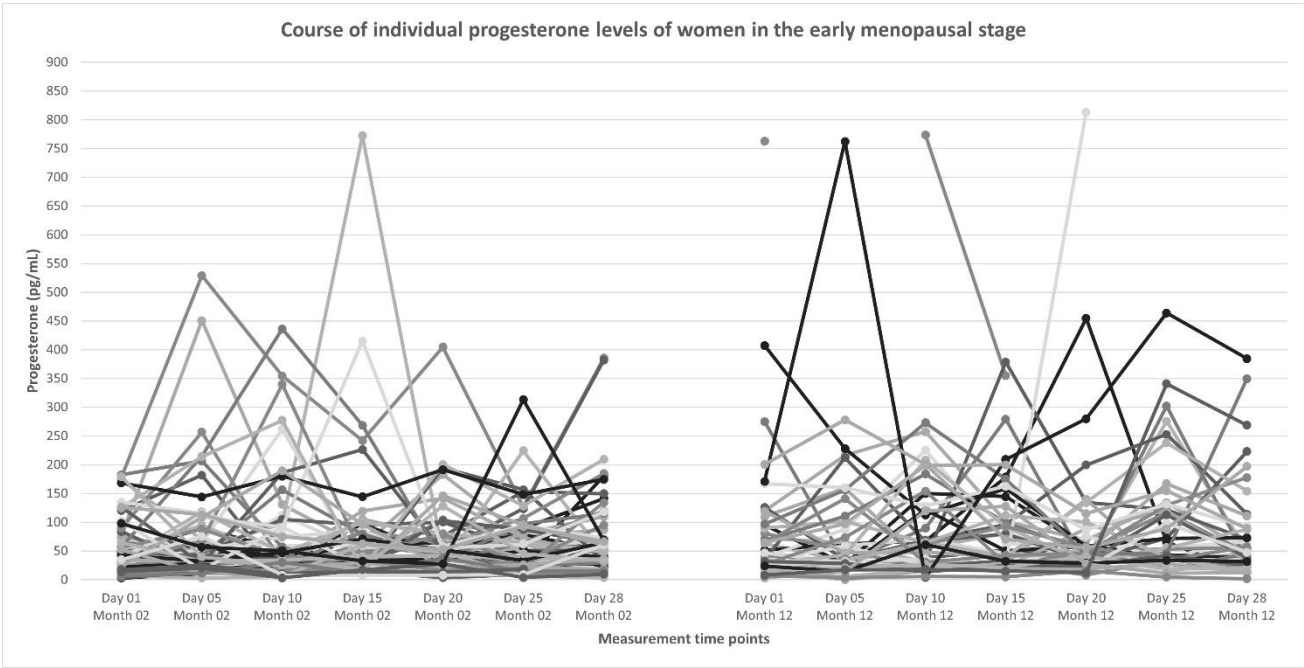

(C)

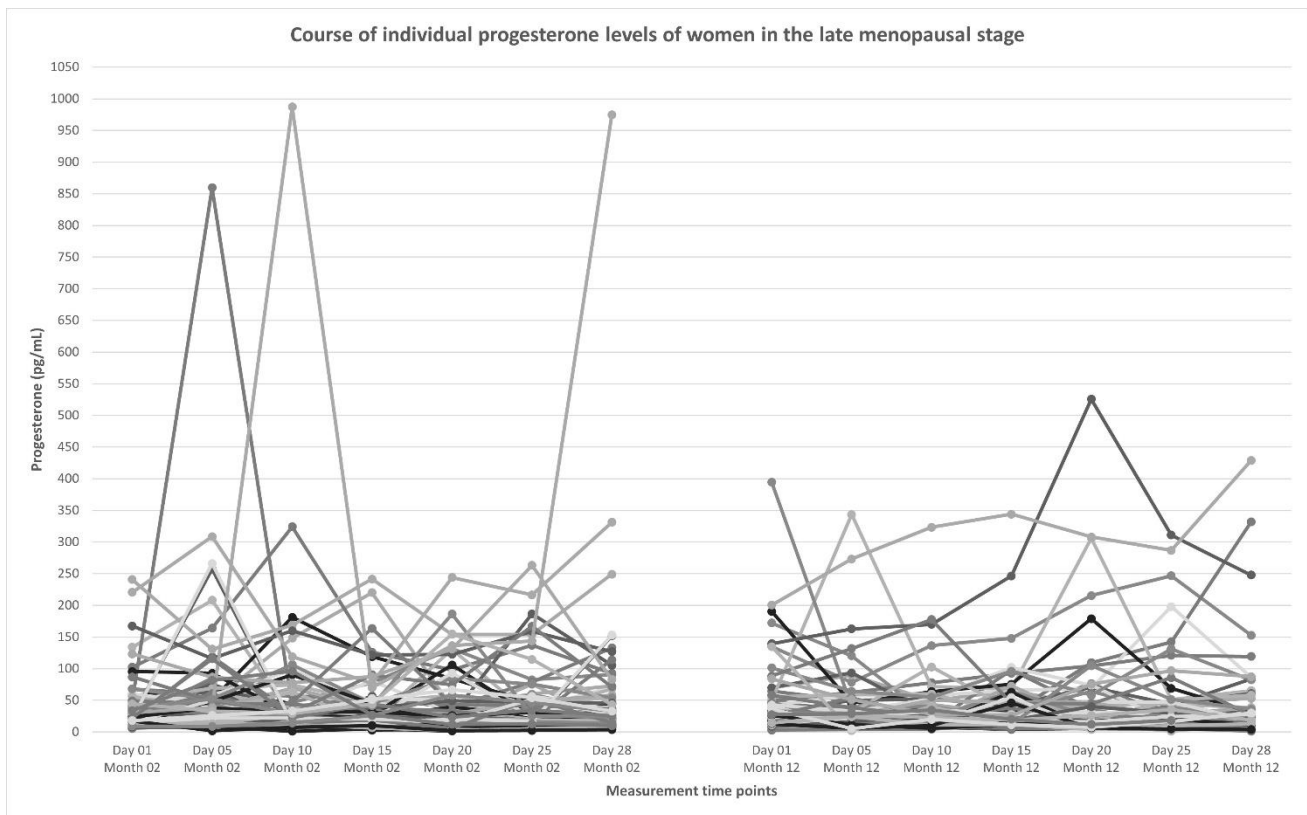

(D)

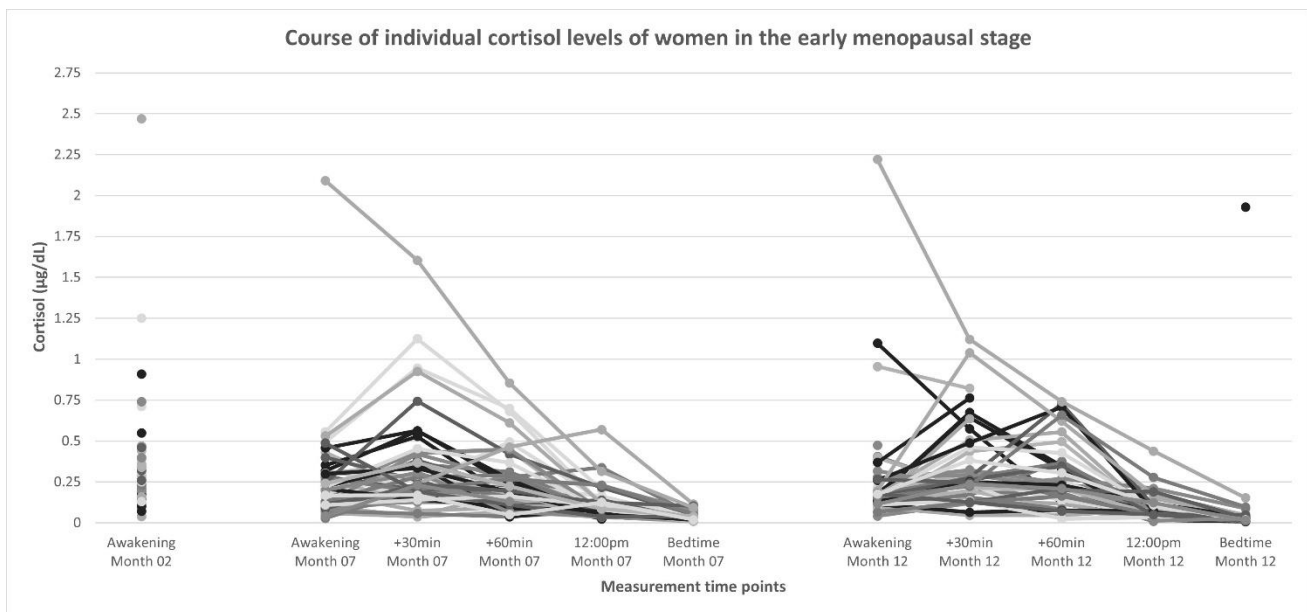

(E)

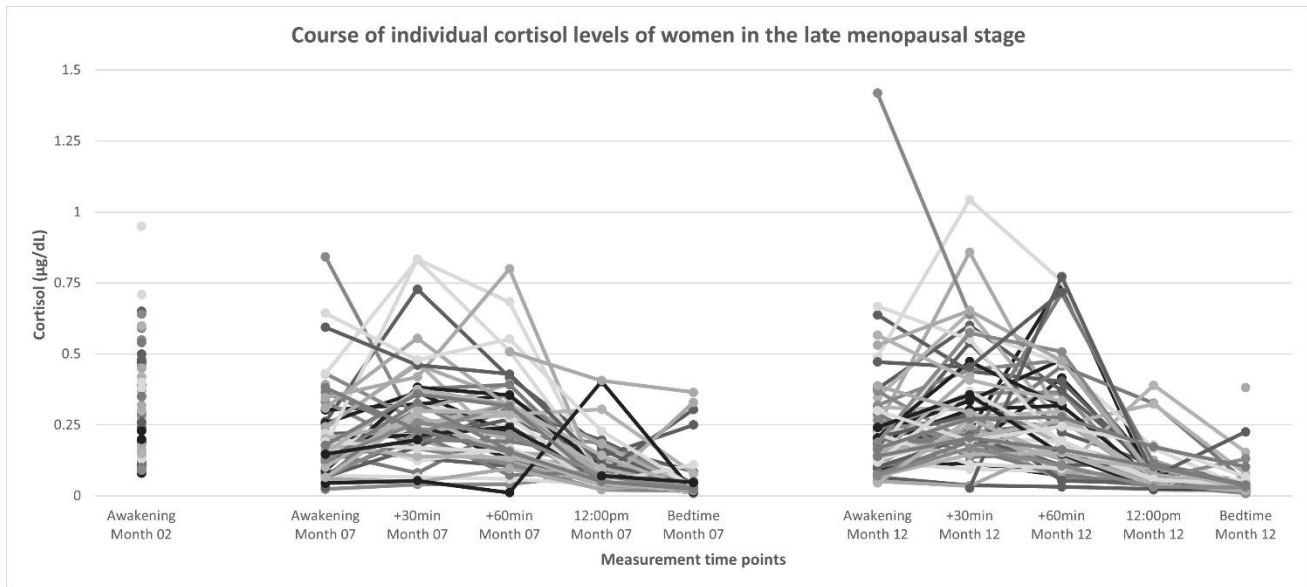

(F)

**Supplementary Figure 1.** Individual levels of endocrine parameters of participants in the early ( $n = 59$ ) and late perimenopause ( $n = 68$ ). **(A)** Estradiol in early perimenopausal participants. **(B)** Estradiol in late perimenopausal participants. **(C)** Progesterone in early perimenopausal participants. **(D)** Progesterone in late perimenopausal participants. **(E)** Cortisol in early perimenopausal participants. **(F)** Cortisol in late perimenopausal participants. The displayed individual levels of estradiol and progesterone are based on fourteen measurements across two non-consecutive months of standardized saliva sampling. Samples 1 to 7 were drawn during month 2 of study participation, samples 8 to 14 were drawn during month 12 of study participation. The displayed individual levels of cortisol are based on eleven measurements across three non-consecutive months of standardized saliva sampling. Sample 1 was drawn during month 2, samples 2 to 6 were drawn during month 7, and samples 7 to 11 were drawn during month 12 of study participation.
